# Supplementary material for: Mitogenomic sequences and evidence from unique gene rearrangements corroborate evolutionary relationships of myctophiformes (Neoteleostei)
Source: PubMed Central journal article supplement (PMC3682873; doi:10.1186/1471-2148-13-111), 2013-06-03
Supplement: 1471-2148-13-111-S1.pdf [file 1471-2148-13-111-S1.pdf]

Six partitions used for 87 taxa: 123<sub>ART</sub><sub>n</sub>

| <b>1</b>    | <b>2</b> | <b>3</b> | <b>4</b> | <b>5</b> | <b>6</b> |
|-------------|----------|----------|----------|----------|----------|
| <b>C01</b>  | ATP6     | ND2      | ATP8     | 12S      | 22 tRNAs |
| <b>C02</b>  | ND1      |          |          | 16S      |          |
| <b>C03</b>  | ND3      |          |          |          |          |
| <b>Cytb</b> | ND4      |          |          |          |          |
|             | ND4L     |          |          |          |          |
|             | ND5      |          |          |          |          |

Six partitions used for 41 taxa: 123<sub>nRT</sub><sub>n</sub>

| <b>1</b>    | <b>2</b> | <b>3</b> | <b>4</b> | <b>5</b> | <b>6</b> |
|-------------|----------|----------|----------|----------|----------|
| <b>ATP6</b> | C01      | ND1      | ND2      | 12S      | 22 tRNAs |
| <b>ATP8</b> |          | ND3      |          | 16S      |          |
| <b>C02</b>  |          | ND4      |          |          |          |
| <b>C03</b>  |          | ND5      |          |          |          |
| <b>Cytb</b> |          |          |          |          |          |
| <b>ND4L</b> |          |          |          |          |          |
