# Supplementary material for: Mitogenomic sequences and evidence from unique gene rearrangements corroborate evolutionary relationships of myctophiformes (Neoteleostei)
Source: PubMed Central journal article supplement (PMC3682873; doi:10.1186/1471-2148-13-111), 2013-06-03

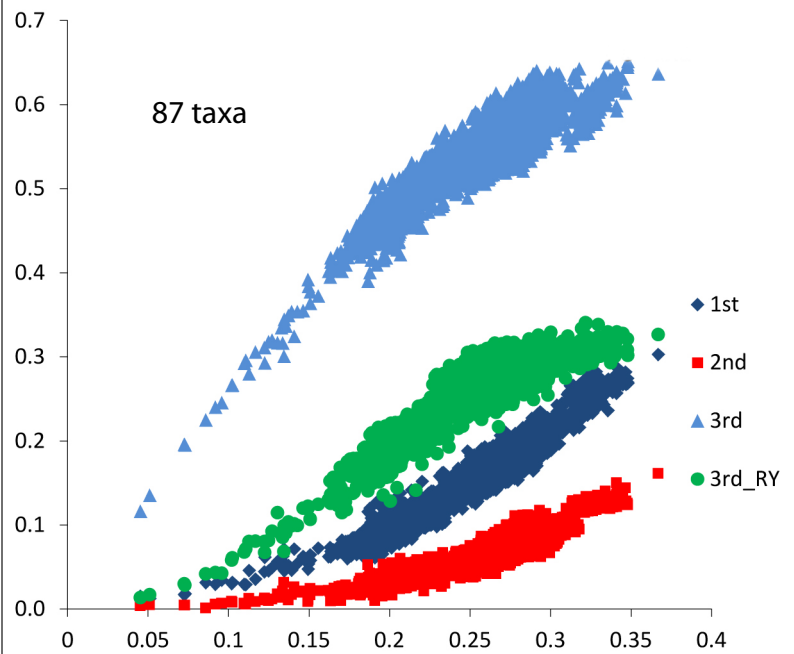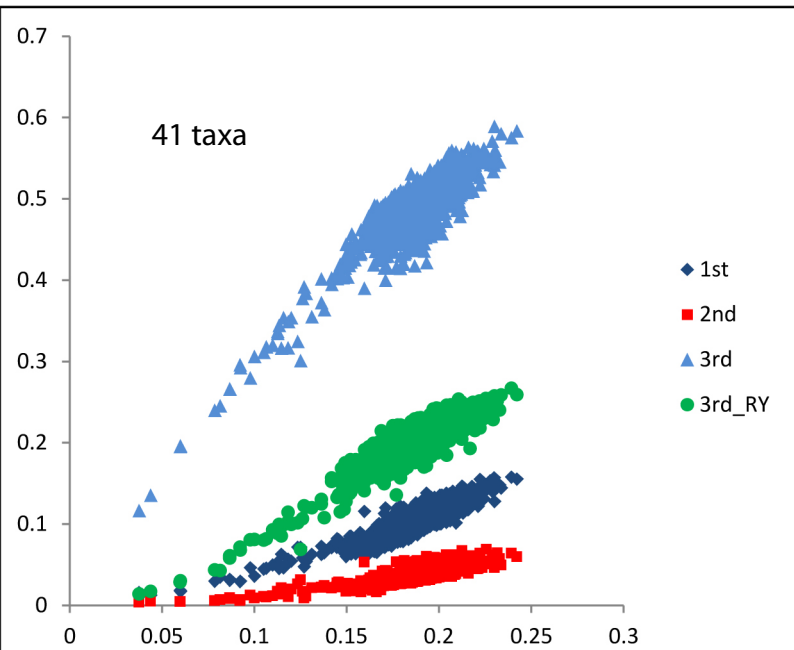

Supplement: 1471-2148-13-111-S2.pdf [file 1471-2148-13-111-S2.pdf]
