# Supplementary material for: Mitogenomic sequences and evidence from unique gene rearrangements corroborate evolutionary relationships of myctophiformes (Neoteleostei)
Source: PubMed Central journal article supplement (PMC3682873; doi:10.1186/1471-2148-13-111), 2013-06-03

LOCARNA-alignments of INC-regions in Myctophidae. Parenthesized numbers refer to the gene order rearrangement involved (presented in Figure 3).

Myctophidae (1). CLUSTAL W --- LocARNA 1.5.2 - Local Alignment of RNA

Sequence alignment for Myctophidae (1) showing species names on the left and aligned nucleotide sequences. The alignment is presented in a standard CLUSTAL W format with dashes indicating gaps.

Lampanyctini subclade (3). CLUSTAL W --- LocARNA 1.5.2 - Local Alignment of RNA

Sequence alignment for the Lampanyctini subclade (3) showing species names on the left and aligned nucleotide sequences. The alignment is presented in a standard CLUSTAL W format with dashes indicating gaps.

Myctophidae (5). CLUSTAL W --- LocARNA 1.5.2 - Local Alignment of RNA

Sequence alignment for Myctophidae (5) showing species names on the left and aligned nucleotide sequences. The alignment is presented in a standard CLUSTAL W format with dashes indicating gaps.

**Myctophini subclade (8).** CLUSTAL W --- LocARNA 1.5.2 - Local Alignment of RNA

```

-----((((.....)))-----((((.....)))-----((((.....)))-----
Bentosema_fibul -----AACTAGCCCTAAAACGCTTGA-----CCCGACT--AATCCCGA-----AAAACGGCC-----CCTCTCCCGCA-----
Bentosema_glaci -----ACCTAGCGTCGCAACTCCTTAG-----GCCGACA--ACTCGCAATACAGAAAATGACC-----CTAGGGCCACCACCAAC
Bentosema_ptero -----ATACCGGTATCAATGGCC-GA-----TCCGGCT--AACC-CCAA-----AAAACCACCC-----
Diogenichthys_at CTTTAACTTACAACACGGACTTAACCGACAAAACGTATCCCTTATATTAACAAGGGACTTAATCACCTACCCCAACTAAGCCGTGGACCATGCGCA
.....((((.....)))-----((((.....)))-----((((.....)))-----

```

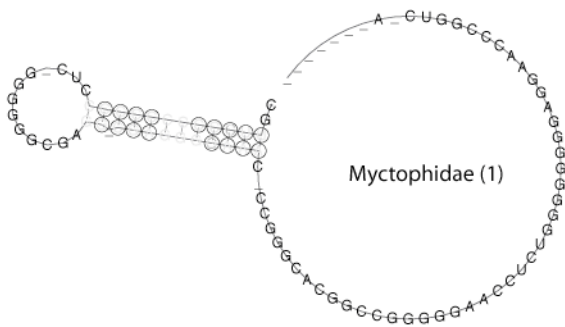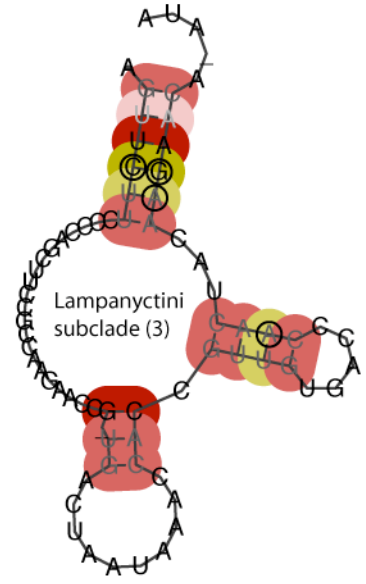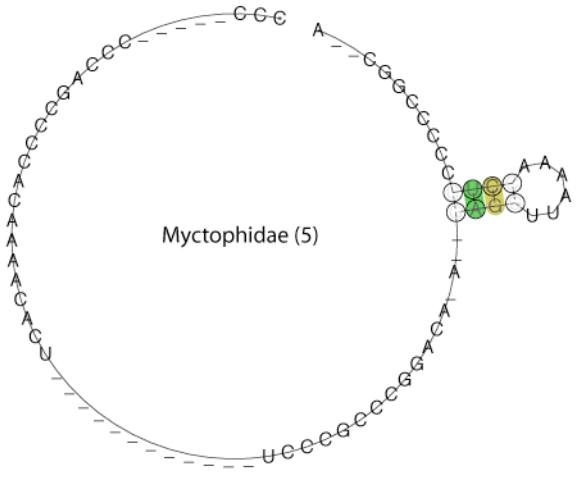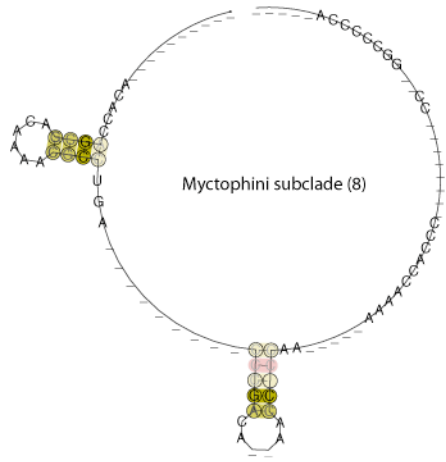

Supplement: 1471-2148-13-111-S3.pdf [file 1471-2148-13-111-S3.pdf]
