# Supplementary material for: Mitogenomic sequences and evidence from unique gene rearrangements corroborate evolutionary relationships of myctophiformes (Neoteleostei)
Source: PubMed Central journal article supplement (PMC3682873; doi:10.1186/1471-2148-13-111), 2013-06-03
Supplement: 1471-2148-13-111-S4.pdf [file 1471-2148-13-111-S4.pdf]

| Classification              | Species                              | 1. WAN <sub>OL</sub> CY         | 2. IQM-region           | 3. ND6/Cytb | 4. ND5/Cytb |  |
|-----------------------------|--------------------------------------|---------------------------------|-------------------------|-------------|-------------|--|
| Neoscopelidae               | <i>Solivomer arenidens</i>           |                                 |                         |             |             |  |
|                             | <i>Scopelengys tristis</i>           |                                 |                         |             |             |  |
|                             | <i>Neoscopelus macrolepidotus</i>    |                                 |                         |             |             |  |
|                             | <i>Neoscopelus microchir</i>         |                                 |                         |             |             |  |
| Notolychnini                | <i>Notolychnus valdiviae</i>         | WAN(67)YC(27)                   | I(21)M(27)QM            |             |             |  |
| Diaphini                    | <i>Lobianchia gemellarii</i>         | WAN(68)YC(19)                   | I(12)M(43)Q(68)         |             |             |  |
|                             | <i>Diaphus theta</i>                 | WAN(90)YC(18)                   | IM(26)Q(62)             |             |             |  |
|                             | <i>Diaphus luetkeni</i>              | WAN(88)YC(17)                   | IMQ(64)                 |             |             |  |
|                             | <i>Diaphus splendidus</i>            | WAN(86)YC(17)                   | IM(12)Q(62)             |             |             |  |
|                             | <i>Diaphus gigas</i>                 | WAN(87)YC(17)                   | IM(13)Q(64)             |             |             |  |
|                             | <i>Diaphus Chrysorhynchus</i>        | WAN(86)YC(16)                   | IMQ(64)                 |             |             |  |
|                             | <i>Gymnoscopelus nicholsi</i>        | WAN(87)Y(32)C(20)               |                         |             |             |  |
| Gymnoscopelini              | <i>Notoscopelus japonicus</i>        | WAN(89)YC(18)                   |                         |             |             |  |
|                             | <i>Notoscopelus kroveri</i>          | WAN(321)Y(26)C(91)              |                         |             |             |  |
|                             | <i>Notoscopelus caudispinosus</i>    | WAN(86)Y(25)C                   |                         |             |             |  |
| Lampanyctini                | <i>Ceratoscopelus maderensis</i>     | WAN(87)YC(14)                   |                         |             |             |  |
|                             | <i>Bolinichthys pyrsobolus</i>       | WAN(87)YC(24)                   |                         |             |             |  |
|                             | <i>Bolinichthys distofax</i>         | WAN(87)YC(17)                   |                         |             |             |  |
|                             | <i>Taaningichthys minimus</i>        | WAN(93)YC(15)                   |                         |             |             |  |
|                             | <i>Lampadena urophaos atlantica</i>  | WA(32)N(80)YC(13)               |                         |             |             |  |
|                             | <i>Lampadena yaquinae</i>            | WAN(89)YC(13)                   |                         |             |             |  |
|                             | <i>Lampadena anomala</i>             | WAN(89)YC(11)                   |                         |             |             |  |
|                             | <i>Stenobranchius leucopsarus</i>    | WAN(90)YC(13)                   |                         | 73          |             |  |
|                             | <i>Triphoturus nigrescens</i>        | WAN(95)Y(17)C(14)               |                         | 68          |             |  |
|                             | <i>Nannobranchium ritteri</i>        | WAN(88)Y(18)C(13)               |                         | 71          |             |  |
|                             | <i>Lampanyctus macdonaldi</i>        | WAN(86)Y(12)C(15)               |                         | 71          |             |  |
|                             | <i>Lampanyctus intricarius</i>       | WAN(86)Y(12)C(13)               |                         | 71          |             |  |
|                             | Electronini                          | <i>Krefflichthys anderssoni</i> | (46)AN(444)ANT(17)C(15) |             |             |  |
|                             |                                      | <i>Protomyctophum arcticum</i>  | (35)A(39)YC(21)         |             |             |  |
| <i>Electrona antarctica</i> |                                      | WAN(77)Y(17)C(14)               |                         |             |             |  |
| Myctophini                  | <i>Diogenichthys atlanticus</i>      | WAN(-)YC                        | IQMM                    |             |             |  |
|                             | <i>Benthoosema glaciale</i>          | (19)WAN(56)YC(17)QM(117)        | I(134)                  |             |             |  |
|                             | <i>Benthoosema pterotum</i>          | WAN(83)YC(10)                   |                         |             |             |  |
|                             | <i>Benthoosema fibulatum</i>         | WAN(65)YC(12)                   |                         |             |             |  |
|                             | <i>Symbolophorus californiensis</i>  | WAN(56)YC(14)                   |                         |             |             |  |
|                             | <i>Myctophum orientale</i>           | WAN(79)YC(13)                   |                         |             |             |  |
|                             | <i>Myctophum asperum</i>             | WAN(86)YC(12)                   |                         |             |             |  |
|                             | <i>Myctophum punctatum</i>           | (13)WAN(68)Y(10)C(15)           | IQ(94)M                 |             | 17          |  |
|                             | <i>Myctophum nitidulum</i>           | WAN(84)Y(9)C(14)                |                         |             | 17          |  |
|                             | <i>Myctophum affine</i>              | WAN(79)Y(11)C(14)               | (89)IQM                 |             | 16          |  |
| Gonichthyini                | <i>Centrobranchus choerocephalus</i> | WAN(88)Y(11)C(14)               |                         |             |             |  |

| Classification              | Species                             | 5. L <sub>r</sub> /ND1          | 6. ATP6/CO3 | 7. ND1/I | 8. CO3/G    | T and downstream |   |
|-----------------------------|-------------------------------------|---------------------------------|-------------|----------|-------------|------------------|---|
| Neoscopelidae               | <i>Solivomer arenidens</i>          |                                 |             |          |             | T(22)P/CR        |   |
|                             | <i>Scopelengys tristis</i>          |                                 |             |          |             | T(11)P/CR        |   |
|                             | <i>Neoscopelus macrolepidotus</i>   |                                 |             |          |             | T(17)P/CR        |   |
|                             | <i>Neoscopelus microchir</i>        |                                 |             |          |             | T(18)P/CR        |   |
| Notolychnini                | <i>Notolychnus valdiviae</i>        | 62                              | 288         |          |             | -                |   |
| Diaphini                    | <i>Lobianchia gemellarii</i>        | 66                              | 18          |          |             | T(157)P/CR       |   |
|                             | <i>Diaphus theta</i>                | 62                              | 19          |          |             | -                |   |
|                             | <i>Diaphus luetkeni</i>             | 62                              | 17          |          |             | T(>615)          |   |
|                             | <i>Diaphus splendidus</i>           | 61                              | 19          |          |             | -                |   |
|                             | <i>Diaphus gigas</i>                | 60                              | 17          |          |             | T(>123)          |   |
|                             | <i>Diaphus Chrysorhynchus</i>       | 60                              | 19          |          |             | T(>500)          |   |
|                             | <i>Gymnoscopelus nicholsi</i>       | 73                              | 25          |          |             | -                |   |
| Gymnoscopelini              | <i>Notoscopelus japonicus</i>       | 75                              | 25          |          |             | T(38)P/CR        |   |
|                             | <i>Notoscopelus kroveri</i>         | 72                              | 25          |          |             | T(136)P/CR       |   |
|                             | <i>Notoscopelus caudispinosus</i>   | 79                              | 25          |          |             | T(39)P/CR        |   |
| Lampanyctini                | <i>Ceratoscopelus maderensis</i>    | 59                              | 19          |          |             | -                |   |
|                             | <i>Bolinichthys pyrsobolus</i>      | 67                              | 24          |          |             | -                |   |
|                             | <i>Bolinichthys distofax</i>        | 67                              | 24          |          |             | -                |   |
|                             | <i>Taaningichthys minimus</i>       | 46                              | 28          |          |             | -                |   |
|                             | <i>Lampadena urophaos atlantica</i> | 72                              | 26          |          |             | T(77)P/CR        |   |
|                             | <i>Lampadena yaquinae</i>           | 73                              | 25          |          |             | T(81)P/CR        |   |
|                             | <i>Lampadena anomala</i>            | 73                              | 25          |          |             | T(81)P/CR        |   |
|                             | <i>Stenobranchius leucopsarus</i>   | 70                              | 24          |          |             | -                |   |
|                             | <i>Triphoturus nigrescens</i>       | 40                              | 24          |          |             | -                |   |
|                             | <i>Nannobranchium ritteri</i>       | 70                              | 24          |          |             | T(109)E(54)P/CR  |   |
|                             | <i>Lampanyctus macdonaldi</i>       | 69                              | 23          |          |             | T(>29)           |   |
|                             | <i>Lampanyctus intricarius</i>      | 68                              | 23          |          |             | T(105)E(>61)     |   |
|                             | Electronini                         | <i>Krefflichthys anderssoni</i> | 55          | 19       | (206)IQM(9) |                  | - |
|                             |                                     | <i>Protomyctophum arcticum</i>  | 49          | 19       | -           |                  | - |
| <i>Electrona antarctica</i> |                                     | 54                              | 19          | (475)IQM | G(468)G     | T(111)P/CR       |   |
| Myctophini                  | <i>Diogenichthys atlanticus</i>     | 49                              | 17          |          | G(99)       | -                |   |
|                             | <i>Benthoosema glaciale</i>         | (69)L <sub>1</sub> (63)         | 17          |          | (70)G       | -                |   |
|                             | <i>Benthoosema pterotum</i>         | 48                              | 12          |          | (46)G       | T(28)P/CR        |   |
|                             | <i>Benthoosema fibulatum</i>        | 57                              | 9           |          | (59)G       | T(43)P/CR        |   |

|              |                                      |    |    |  |  |                     |
|--------------|--------------------------------------|----|----|--|--|---------------------|
|              | <i>Symbolophorus californiensis</i>  | 54 | 18 |  |  | -                   |
|              | <i>Myctophum orientale</i>           | 48 | 17 |  |  | T(28)P/CR           |
|              | <i>Myctophum asperum</i>             | 45 | 19 |  |  | T(>247)             |
|              | <i>Myctophum punctatum</i>           | 58 | 17 |  |  | T(>117)             |
|              | <i>Myctophum nitidulum</i>           | 54 | 16 |  |  | T(104)ND6/E(37)P/CR |
|              | <i>Myctophum affine</i>              | 58 | 16 |  |  | T(98)ND6/E(22)P/CR  |
| Gonichthyini | <i>Centrobranchus choerocephalus</i> | 50 | 43 |  |  | T(>373)             |
