# Supplementary material for: Mitogenomic sequences and evidence from unique gene rearrangements corroborate evolutionary relationships of myctophiformes (Neoteleostei)
Source: PubMed Central journal article supplement (PMC3682873; doi:10.1186/1471-2148-13-111), 2013-06-03
Supplement: 1471-2148-13-111-S5.pdf [file 1471-2148-13-111-S5.pdf]

# Scarid parrotfishes

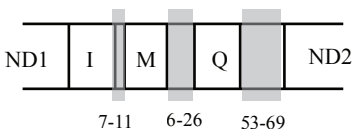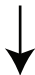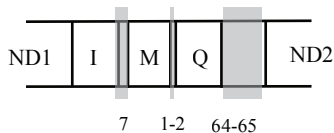

## Scaridae

- *Calotomus japonicus* 10 + 6 + 69
- *Cetoscarus bicolor* 11 + 6 + 64
- *Chlorurus sordidus* 7 + 9 + 66
- *Leptoscarus vaigiensis* 10 + 11 + 62
- *Nicholsina usta* 8 + 11 + 60
- *Scarus ghobban* 7 + 11 + 65
- *Scarus guacamaia* 7 + 15 + 65
- *Scarus rubroviolaceus* 7 + 11 + 65
- *Scarus schlegeli* 7 + 26 + 65
- *Spariosoma chrysopteryum* 11 + 10 + 53

## Scaridae

- *Scarus forsteni* 7 + 1 + 64
- *Scarus niger* 7 + 1 + 65
- *Scarus oviceps* 7 + 2 + 65
